# Supplementary material
Source: Springer Nature journal article supplement (https://www.springermedizin.de/resource/supplementary/12967_2012_1508_MOESM5_ESM.pdf/9574232)

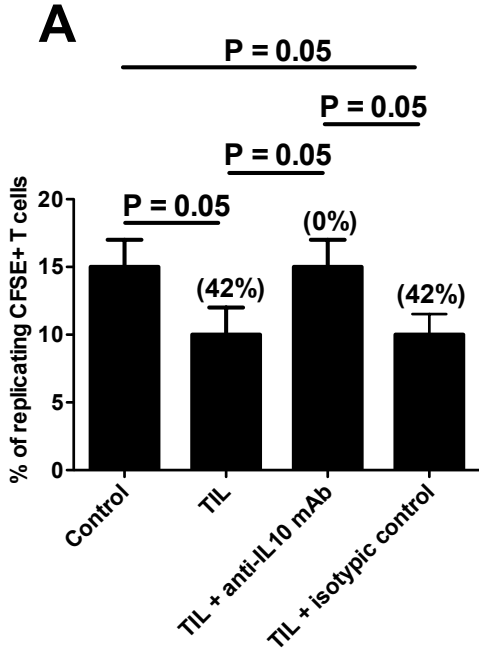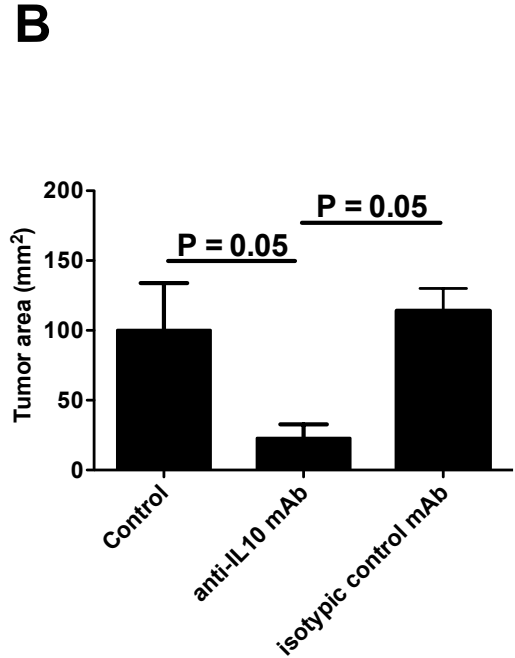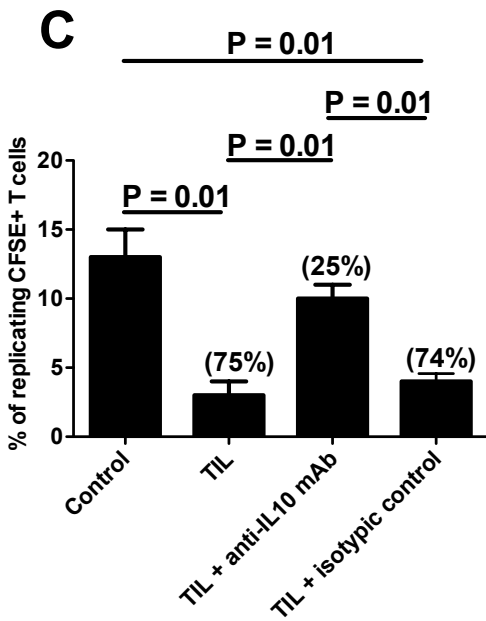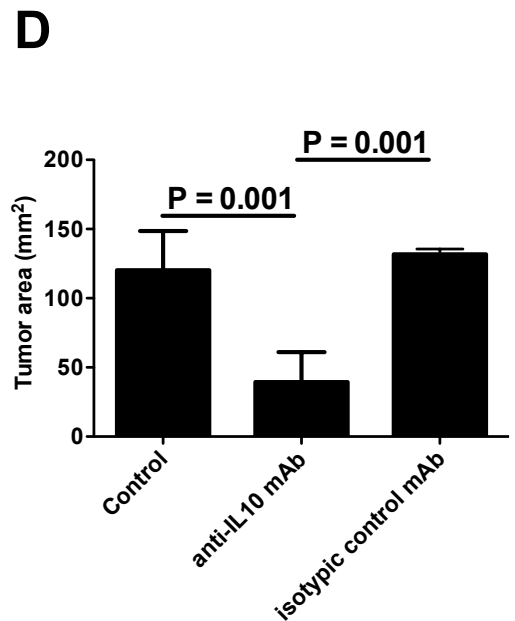

Supplement: MOESM5 [file 9574232]
